# Supplementary material for: Long-term follow-up with a smartphone application improves exercise capacity post cardiac rehabilitation: A randomized controlled trial
Source: PubMed Central journal article supplement (PMC7564298; doi:10.1177/2047487320905717), 2020-02-28
Supplement: CPR905717_Supplemental_Material1.pdf [file CPR905717_Supplemental_Material1.pdf]

| <b>Table S1.</b> Distribution in percentage of reporting level 1 to 5 by dimension, group and measure time point |         |                             |                           |                            |                          |                            |                          |
|------------------------------------------------------------------------------------------------------------------|---------|-----------------------------|---------------------------|----------------------------|--------------------------|----------------------------|--------------------------|
| <b>EQ-5D DIMENSION</b>                                                                                           |         | <b>Total</b>                |                           | <b>Control group</b>       |                          | <b>Intervention group</b>  |                          |
|                                                                                                                  |         | <b>Baseline<br/>(n=113)</b> | <b>1-year<br/>(n=111)</b> | <b>Baseline<br/>(n=56)</b> | <b>1-year<br/>(n=56)</b> | <b>Baseline<br/>(n=57)</b> | <b>1-year<br/>(n=55)</b> |
| <b>MOBILITY</b>                                                                                                  | Level 1 | 85.8%                       | 92.8%                     | 85.7%                      | 89.3%                    | 86%                        | 96.4%                    |
|                                                                                                                  | Level 2 | 10.6%                       | 4.5%                      | 8.9%                       | 5.4%                     | 12.3%                      | 3.6%                     |
|                                                                                                                  | Level 3 | 2.7%                        | 1.8%                      | 5.4%                       | 3.6%                     | 0%                         | 0%                       |
|                                                                                                                  | Level 4 | 0.9%                        | 0.9%                      | 0%                         | 1.8%                     | 1.8%                       | 0%                       |
|                                                                                                                  | Level 5 | 0%                          | 0%                        | 0%                         | 0%                       | 0%                         | 0%                       |
| <b>SELF-CARE</b>                                                                                                 | Level 1 | 95.6%                       | 98.2%                     | 92.9%                      | 98.2%                    | 98.2%                      | 98.2%                    |
|                                                                                                                  | Level 2 | 4.4%                        | 1.8%                      | 7.1%                       | 1.8%                     | 1.8%                       | 1.8%                     |
|                                                                                                                  | Level 3 | 0%                          | 0%                        | 0%                         | 0%                       | 0%                         | 0%                       |
|                                                                                                                  | Level 4 | 0%                          | 0%                        | 0%                         | 0%                       | 0%                         | 0%                       |
|                                                                                                                  | Level 5 | 0%                          | 0%                        | 0%                         | 0%                       | 0%                         | 0%                       |
| <b>USUAL ACTIVITY</b>                                                                                            | Level 1 | 74.3%                       | 82.9%                     | 80.4%                      | 85.7%                    | 68.4%                      | 80%                      |
|                                                                                                                  | Level 2 | 21.2%                       | 16.2%                     | 16.1%                      | 12.5%                    | 26.3%                      | 20%                      |
|                                                                                                                  | Level 3 | 4.4%                        | 0.9%                      | 3.6%                       | 1.8%                     | 5.3%                       | 0%                       |
|                                                                                                                  | Level 4 | 0%                          | 0%                        | 0%                         | 0%                       | 0%                         | 0%                       |
|                                                                                                                  | Level 5 | 0%                          | 0%                        | 0%                         | 0%                       | 0%                         | 0%                       |
| <b>PAIN /<br/>DISCOMFORT</b>                                                                                     | Level 1 | 40.7%                       | 50.5%                     | 42.9%                      | 46.4%                    | 38.6%                      | 54.5%                    |
|                                                                                                                  | Level 2 | 47.8%                       | 31.5%                     | 44.6%                      | 32.1%                    | 50.9%                      | 30.9%                    |
|                                                                                                                  | Level 3 | 8%                          | 12.6%                     | 7.1%                       | 12.5%                    | 8.8%                       | 12.7%                    |
|                                                                                                                  | Level 4 | 2.7%                        | 5.4%                      | 3.6%                       | 8.9%                     | 1.8%                       | 1.8%                     |
|                                                                                                                  | Level 5 | 0.9%                        | 0%                        | 1.8%                       | 0%                       | 0%                         | 0%                       |
| <b>ANXIETY /<br/>DEPRESSION</b>                                                                                  | Level 1 | 60.2%                       | 64.9%                     | 55.4%                      | 60.7%                    | 64.9%                      | 69.1%                    |
|                                                                                                                  | Level 2 | 36.3%                       | 28.8%                     | 42.9%                      | 33.9%                    | 29.8%                      | 23.6%                    |
|                                                                                                                  | Level 3 | 3.5%                        | 4.5%                      | 1.8%                       | 1.8%                     | 5.3%                       | 7.3%                     |
|                                                                                                                  | Level 4 | 0%                          | 1.8%                      | 0%                         | 3.6%                     | 0%                         | 0%                       |
|                                                                                                                  | Level 5 | 0%                          | 0%                        | 0%                         | 0%                       | 0%                         | 0%                       |
