# Supplementary material for: Long-term follow-up with a smartphone application improves exercise capacity post cardiac rehabilitation: A randomized controlled trial
Source: PubMed Central journal article supplement (PMC7564298; doi:10.1177/2047487320905717), 2020-02-28
Supplement: CPR905717_Supplemental_Material3.pdf [file CPR905717_Supplemental_Material3.pdf]

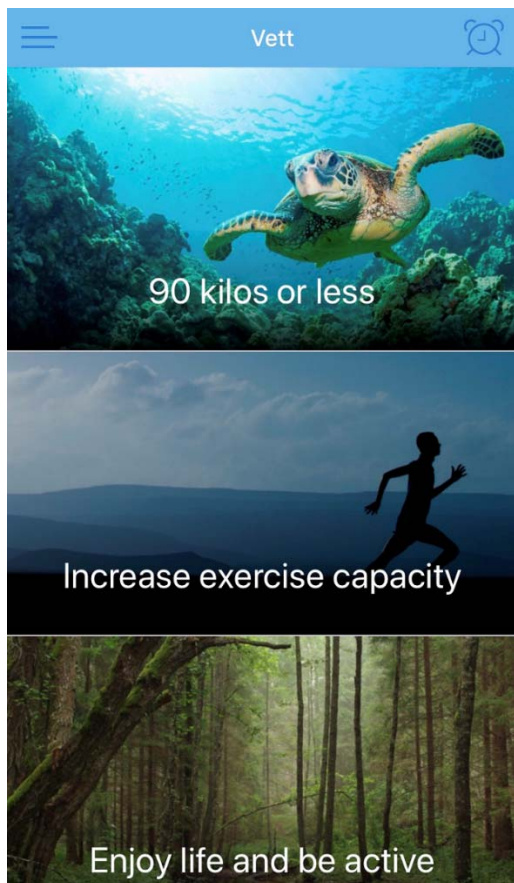

Figure S1. Example of user interface of the app showing individual goals
